# Supplementary material
Source: publisher figshare collection journal article supplement (https://acs.figshare.com/ndownloader/files/24317760)
Supplement: Supplementary file 1 [file 24317760]

## Supplementary Information

### Atmospheric Fate of Methyl Isocyanate, CH<sub>3</sub>NCO: OH and Cl Reaction Kinetics and Identification of Formyl Isocyanate, HC(O)NCO

Dimitrios K. Papanastasiou<sup>1,2,&</sup>, François Bernard<sup>1,2,#</sup>, and James B. Burkholder<sup>1</sup>

<sup>1</sup> Chemical Sciences Laboratory, National Oceanic and Atmospheric Administration, 325 Broadway, Boulder, CO, USA 80305-3328

<sup>2</sup> Cooperative Institute for Research in Environmental Sciences, University of Colorado, Boulder, CO, USA 80309

& Current address: Buffalo Research Laboratories, Honeywell International Inc., 20 Peabody St., Buffalo NY 14210 USA

# Current address: Laboratoire de Physique et Chimie de l'Environnement et de l'Espace (LPC2E), Centre National de la Recherche Scientifique (CNRS), Université d'Orléans, Observatoire des Sciences de l'Univers en région Centre - Val de Loire (OSUC), Orléans, France

\*Corresponding author: James B. Burkholder

e-mail: [James.B.Burkholder@noaa.gov](mailto:James.B.Burkholder@noaa.gov)

Phone: (303)-497-3252

ORCID: [0000-0001-9532-6246](https://orcid.org/0000-0001-9532-6246)

## Infrared Absorption Spectrum

The infrared absorption spectrum of methyl isocyanate ( $\text{CH}_3\text{NCO}$ , MIC) at 295 K measured in this work is shown in **Figure S1**. The  $\text{CH}_3\text{NCO}$  spectra was acquired using independently prepared dilute mixtures of  $\text{CH}_3\text{NCO}$  in He (mixing ratio ranged from 0.316 to 3.48%), different absorption pathlengths (15, 125, 305, and 485 cm), as well as with measurements performed under static or flow conditions were in good agreement, to within  $\sim 4\%$ . The infrared spectrum was independent of total pressure (He bath gas) over the 5 and 320 Torr range. The infrared spectrum of  $\text{CH}_3\text{NCO}$  shows a strong absorption band between 2200 and 2400  $\text{cm}^{-1}$ , which is characteristic of the isocyanate functionality.<sup>1</sup>

The absorption band strength for the 1900–2700  $\text{cm}^{-1}$  region is  $(1.58 \pm 0.02) \times 10^{-16} \text{ cm}^2 \text{ molecule}^{-1} \text{ cm}^{-1}$ , where the uncertainty is the fit precision, as determined by a linear least-squares fit of the integrated absorbance versus  $[\text{CH}_3\text{NCO}] \times \text{Pathlength}$  (see **Figure S2**). The  $\text{CH}_3\text{NCO}$  infrared spectrum from the infrared database of the Pacific Northwest Laboratory<sup>2</sup> is in good agreement (to within 5%) with the spectrum from this work. Note that the  $\text{CH}_3\text{NCO}$  gas mixtures used for the measurements contained  $<3\%$  TMCS and  $<0.1\%$  HMDS and the infrared spectrum reported here was corrected for those impurities using reference spectra. We should also note that the  $\text{CH}_3\text{NCO}$  absorption band in the 1900–2700  $\text{cm}^{-1}$  region is free of any contribution from TMCS and HMDS.

## UV Absorption Spectrum

The UV absorption spectrum of  $\text{CH}_3\text{NCO}$ , measured at 295 K in this work is shown in **Figure S3**. The spectrum at intervals of 0.5 nm is given in **Table S1**. At 200 nm the cross section is  $(2.40 \pm 0.06) \times 10^{-19} \text{ cm}^2 \text{ molecule}^{-1}$  and seems to be in the tail of a shorter wavelength excitation, while at  $\sim 215$  nm a weaker transition is observed. At wavelengths greater than 230 nm, the spectrum decreases monotonically. The UV spectra measurements did not show any significant absorption (cross sections are below  $1 \times 10^{-21} \text{ cm}^2 \text{ molecule}^{-1}$ ) for wavelengths longer than 260 nm. The precision of the data is better than 3% from 200 to 230 nm, while at longer wavelengths the uncertainty increases to  $\sim 10\%$  at 250 nm.

UV spectra measurements were performed using a TMCS/He gas mixtures with known HMDS impurities ( $<3\%$ ). Using the latter gas mixture at similar concentrations to what is expected in the  $\text{CH}_3\text{NCO}$ /He gas mixtures it was shown that TMCS and HMDS make a negligible

contribution (<0.1%) to the observed CH<sub>3</sub>NCO absorption for the wavelength range between 200 and 260 nm.

The Beer's law plot for CH<sub>3</sub>NCO at 184.9 nm is shown in **Figure S4**. The absorption cross section of CH<sub>3</sub>NCO at 184.9 nm is  $(1.95 \pm 0.02) \times 10^{-18} \text{ cm}^2 \text{ molecule}^{-1}$  and was determined with measurements using 2 different gas mixtures of CH<sub>3</sub>NCO in He as well as 2 different absorption path lengths (25 and 100 cm). On the basis of the complementary infrared measurements, the gas mixtures contained <3% TMCS and <0.1% HMDS, which would make a negligible contribution (<1%) to the absorption measurement based on available 184.9 nm absorption cross section data for TMCS ( $2.2 \times 10^{-19} \text{ cm}^2 \text{ molecule}^{-1}$ ) and HMDS ( $8.99 \times 10^{-18} \text{ cm}^2 \text{ molecule}^{-1}$ ).<sup>3,4</sup> The absorption cross section at 184.9 nm reported in this work is in good agreement with the value of  $2 \times 10^{-18} \text{ cm}^2 \text{ molecule}^{-1}$  reported in the study of Tokue et al., where the VUV absorption of CH<sub>3</sub>NCO was measured.<sup>5</sup>

**Table S1.** UV absorption cross sections for methyl isocyanate (CH<sub>3</sub>NCO) at 296 K obtained in this work between 200 and 260 nm. Uncertainties are the 2 $\sigma$  precision of the measurement.

| $\lambda$<br>(nm) | $\sigma$<br>(10 <sup>-20</sup> cm <sup>2</sup> molecule <sup>-1</sup> ) | Uncertainty<br>(10 <sup>-20</sup> cm <sup>2</sup> molecule <sup>-1</sup> ) | $\lambda$<br>(nm) | $\sigma$<br>(10 <sup>-20</sup> cm <sup>2</sup> molecule <sup>-1</sup> ) | Uncertainty<br>(10 <sup>-20</sup> cm <sup>2</sup> molecule <sup>-1</sup> ) |
|-------------------|-------------------------------------------------------------------------|----------------------------------------------------------------------------|-------------------|-------------------------------------------------------------------------|----------------------------------------------------------------------------|
| 200.0             | 24.0                                                                    | 0.6                                                                        | 230.5             | 2.63                                                                    | 0.04                                                                       |
| 200.5             | 22.4                                                                    | 0.5                                                                        | 231.0             | 2.53                                                                    | 0.03                                                                       |
| 201.0             | 21.1                                                                    | 0.4                                                                        | 231.5             | 2.43                                                                    | 0.04                                                                       |
| 201.5             | 19.7                                                                    | 0.4                                                                        | 232.0             | 2.34                                                                    | 0.03                                                                       |
| 202.0             | 18.5                                                                    | 0.3                                                                        | 232.5             | 2.25                                                                    | 0.03                                                                       |
| 202.5             | 17.3                                                                    | 0.3                                                                        | 233.0             | 2.16                                                                    | 0.03                                                                       |
| 203.0             | 16.3                                                                    | 0.3                                                                        | 233.5             | 2.07                                                                    | 0.03                                                                       |
| 203.5             | 15.4                                                                    | 0.2                                                                        | 234.0             | 1.99                                                                    | 0.03                                                                       |
| 204.0             | 14.5                                                                    | 0.2                                                                        | 234.5             | 1.91                                                                    | 0.03                                                                       |
| 204.5             | 13.7                                                                    | 0.2                                                                        | 235.0             | 1.83                                                                    | 0.03                                                                       |
| 205.0             | 13.0                                                                    | 0.2                                                                        | 235.5             | 1.75                                                                    | 0.03                                                                       |
| 205.5             | 12.3                                                                    | 0.2                                                                        | 236.0             | 1.68                                                                    | 0.03                                                                       |
| 206.0             | 11.7                                                                    | 0.2                                                                        | 236.5             | 1.61                                                                    | 0.03                                                                       |
| 206.5             | 11.2                                                                    | 0.2                                                                        | 237.0             | 1.53                                                                    | 0.03                                                                       |
| 207.0             | 10.7                                                                    | 0.2                                                                        | 237.5             | 1.47                                                                    | 0.03                                                                       |
| 207.5             | 10.3                                                                    | 0.2                                                                        | 238.0             | 1.40                                                                    | 0.02                                                                       |
| 208.0             | 9.85                                                                    | 0.15                                                                       | 238.5             | 1.34                                                                    | 0.03                                                                       |
| 208.5             | 9.48                                                                    | 0.14                                                                       | 239.0             | 1.28                                                                    | 0.03                                                                       |
| 209.0             | 9.14                                                                    | 0.14                                                                       | 239.5             | 1.22                                                                    | 0.03                                                                       |
| 209.5             | 8.83                                                                    | 0.13                                                                       | 240.0             | 1.17                                                                    | 0.03                                                                       |
| 210.0             | 8.54                                                                    | 0.13                                                                       | 240.5             | 1.11                                                                    | 0.03                                                                       |
| 210.5             | 8.28                                                                    | 0.12                                                                       | 241.0             | 1.06                                                                    | 0.03                                                                       |
| 211.0             | 8.03                                                                    | 0.12                                                                       | 241.5             | 1.01                                                                    | 0.03                                                                       |
| 211.5             | 7.80                                                                    | 0.12                                                                       | 242.0             | 0.962                                                                   | 0.028                                                                      |
| 212.0             | 7.59                                                                    | 0.12                                                                       | 242.5             | 0.916                                                                   | 0.033                                                                      |
| 212.5             | 7.39                                                                    | 0.11                                                                       | 243.0             | 0.873                                                                   | 0.031                                                                      |
| 213.0             | 7.20                                                                    | 0.11                                                                       | 243.5             | 0.831                                                                   | 0.034                                                                      |
| 213.5             | 7.02                                                                    | 0.10                                                                       | 244.0             | 0.790                                                                   | 0.033                                                                      |
| 214.0             | 6.84                                                                    | 0.10                                                                       | 244.5             | 0.751                                                                   | 0.032                                                                      |
| 214.5             | 6.68                                                                    | 0.09                                                                       | 245.0             | 0.716                                                                   | 0.034                                                                      |
| 215.0             | 6.52                                                                    | 0.09                                                                       | 245.5             | 0.677                                                                   | 0.032                                                                      |
| 215.5             | 6.37                                                                    | 0.09                                                                       | 246.0             | 0.645                                                                   | 0.035                                                                      |
| 216.0             | 6.22                                                                    | 0.09                                                                       | 246.5             | 0.611                                                                   | 0.034                                                                      |
| 216.5             | 6.06                                                                    | 0.09                                                                       | 247.0             | 0.581                                                                   | 0.034                                                                      |
| 217.0             | 5.93                                                                    | 0.08                                                                       | 247.5             | 0.550                                                                   | 0.032                                                                      |
| 217.5             | 5.79                                                                    | 0.08                                                                       | 248.0             | 0.522                                                                   | 0.036                                                                      |
| 218.0             | 5.65                                                                    | 0.08                                                                       | 248.5             | 0.495                                                                   | 0.034                                                                      |
| 218.5             | 5.51                                                                    | 0.08                                                                       | 249.0             | 0.470                                                                   | 0.035                                                                      |
| 219.0             | 5.37                                                                    | 0.08                                                                       | 249.5             | 0.446                                                                   | 0.037                                                                      |
| 219.5             | 5.24                                                                    | 0.07                                                                       | 250.0             | 0.422                                                                   | 0.036                                                                      |
| 220.0             | 5.11                                                                    | 0.07                                                                       | 250.5             | 0.399                                                                   | 0.037                                                                      |
| 220.5             | 4.98                                                                    | 0.06                                                                       | 251.0             | 0.381                                                                   | 0.036                                                                      |
| 221.0             | 4.85                                                                    | 0.06                                                                       | 251.5             | 0.358                                                                   | 0.035                                                                      |
| 221.5             | 4.72                                                                    | 0.07                                                                       | 252.0             | 0.337                                                                   | 0.037                                                                      |
| 222.0             | 4.59                                                                    | 0.06                                                                       | 252.5             | 0.321                                                                   | 0.038                                                                      |
| 222.5             | 4.46                                                                    | 0.06                                                                       | 253.0             | 0.304                                                                   | 0.036                                                                      |
| 223.0             | 4.34                                                                    | 0.06                                                                       | 253.5             | 0.289                                                                   | 0.038                                                                      |
| 223.5             | 4.21                                                                    | 0.05                                                                       | 254.0             | 0.271                                                                   | 0.037                                                                      |
| 224.0             | 4.09                                                                    | 0.05                                                                       | 254.5             | 0.257                                                                   | 0.037                                                                      |
| 224.5             | 3.96                                                                    | 0.06                                                                       | 255.0             | 0.242                                                                   | 0.036                                                                      |
| 225.0             | 3.84                                                                    | 0.05                                                                       | 255.5             | 0.228                                                                   | 0.037                                                                      |
| 225.5             | 3.72                                                                    | 0.05                                                                       | 256.0             | 0.217                                                                   | 0.039                                                                      |
| 226.0             | 3.60                                                                    | 0.05                                                                       | 256.5             | 0.204                                                                   | 0.037                                                                      |
| 226.5             | 3.49                                                                    | 0.05                                                                       | 257.0             | 0.191                                                                   | 0.035                                                                      |
| 227.0             | 3.37                                                                    | 0.04                                                                       | 257.5             | 0.181                                                                   | 0.035                                                                      |
| 227.5             | 3.26                                                                    | 0.05                                                                       | 258.0             | 0.173                                                                   | 0.034                                                                      |
| 228.0             | 3.15                                                                    | 0.04                                                                       | 258.5             | 0.162                                                                   | 0.036                                                                      |
| 228.5             | 3.04                                                                    | 0.04                                                                       | 259.0             | 0.155                                                                   | 0.040                                                                      |
| 229.0             | 2.93                                                                    | 0.04                                                                       | 259.5             | 0.144                                                                   | 0.034                                                                      |
| 229.5             | 2.83                                                                    | 0.04                                                                       | 260.0             | 0.134                                                                   | 0.036                                                                      |
| 230.0             | 2.73                                                                    | 0.04                                                                       |                   |                                                                         |                                                                            |

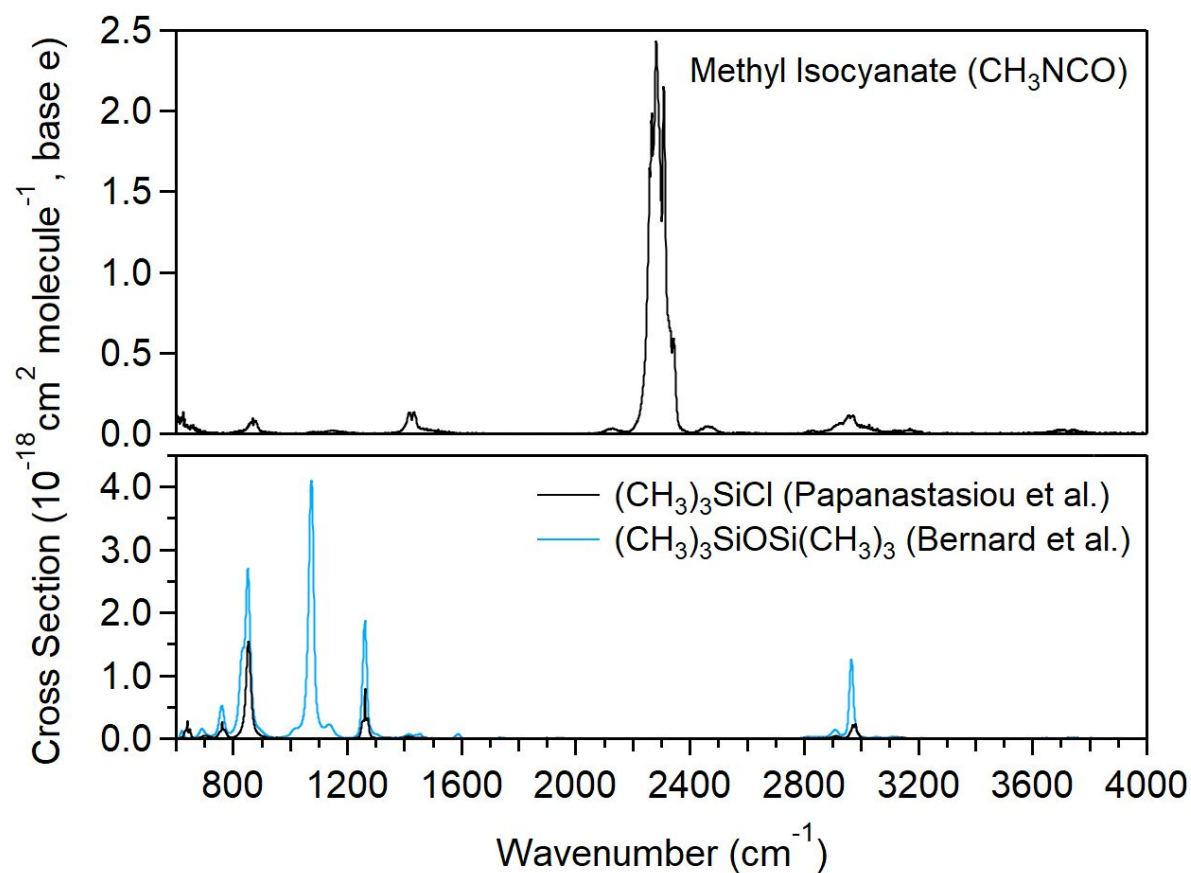

**Figure S1.** (a) Infrared absorption spectrum of methyl isocyanate,  $\text{CH}_3\text{NCO}$ , measured in this work at  $1 \text{ cm}^{-1}$  resolution. (b) Infrared absorption spectrum of trimethylchlorosilane,  $(\text{CH}_3)_3\text{SiCl}$ , taken from Papanastasiou et al.<sup>6</sup> at  $1 \text{ cm}^{-1}$  resolution and that of hexamethyldisiloxane,  $(\text{CH}_3)_3\text{SiOSi}(\text{CH}_3)_3$ , taken from Bernard et al.<sup>7</sup>

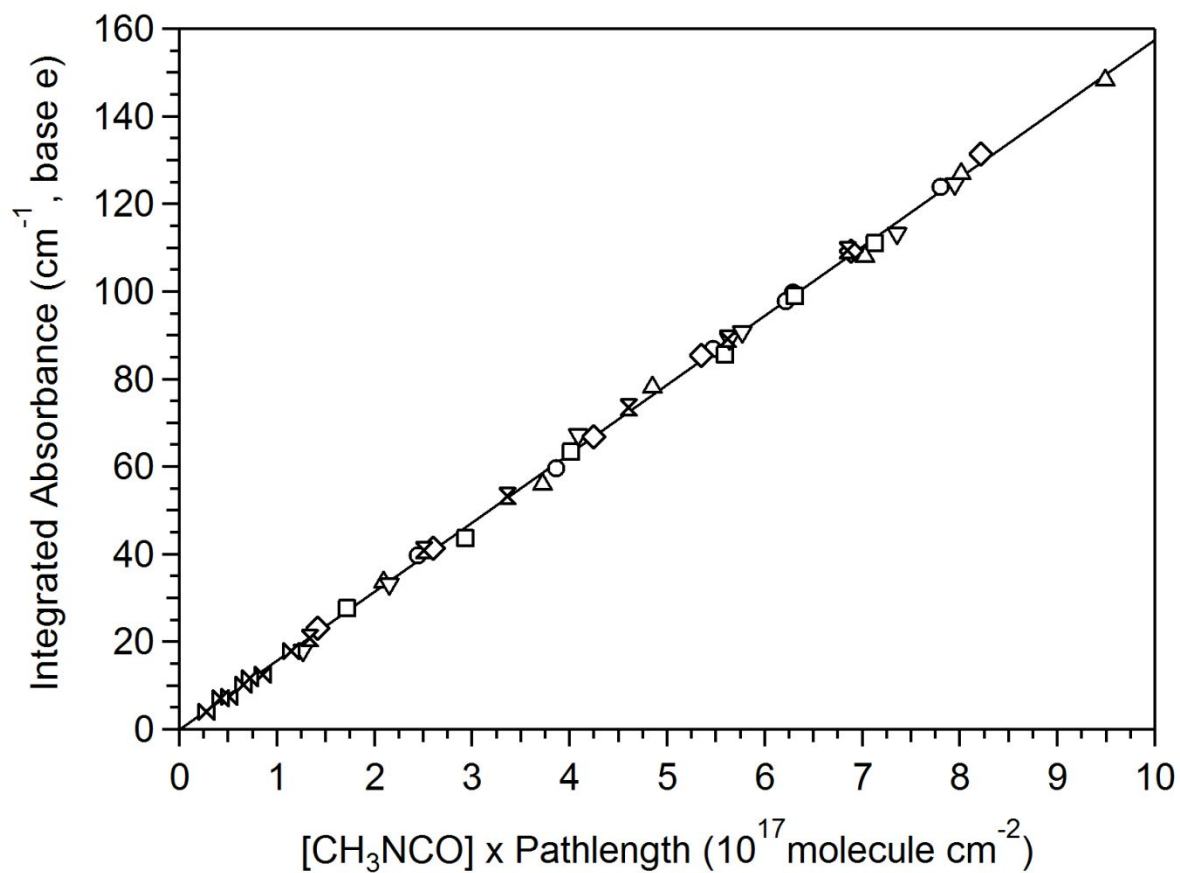

**Figure S2.** CH<sub>3</sub>NCO absorption band strength between 1900 and 2700 cm<sup>-1</sup> measured in this work. The different symbols represent measurements with different mixtures of CH<sub>3</sub>NCO in He (mixing ratio ranged from ~0.3 to ~3%), different absorption cell pathlengths (15, 125, 305, and 485 cm), as well as with measurements done under static or flow conditions.

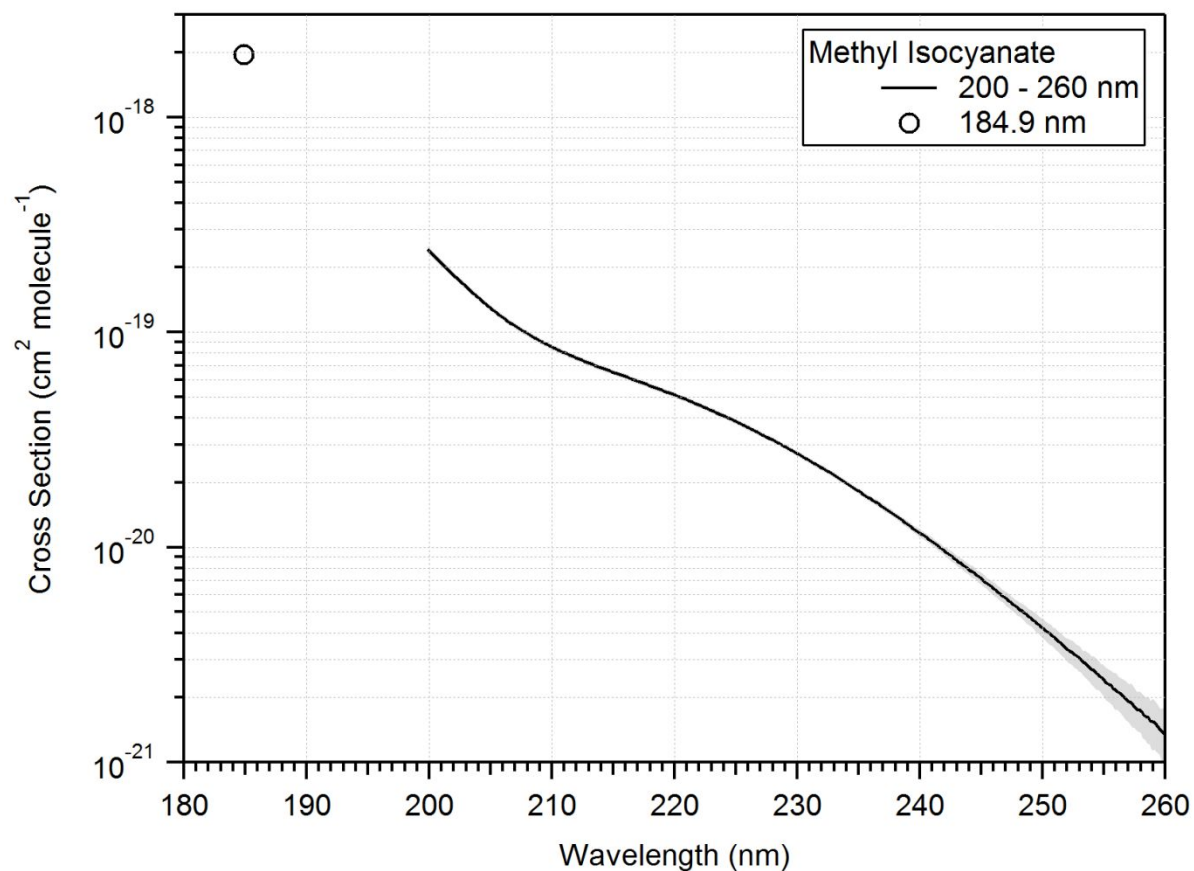

**Figure S3.** CH<sub>3</sub>NCO UV absorption spectrum between 200 and 260 nm and at 184.9 nm measured in this work. The limits of the grey shaded region are the estimated 2 $\sigma$  precision of the measurement (see **Table S1**). The estimated 2 $\sigma$  precision for the 184.9 nm cross section measurements is ~1%.

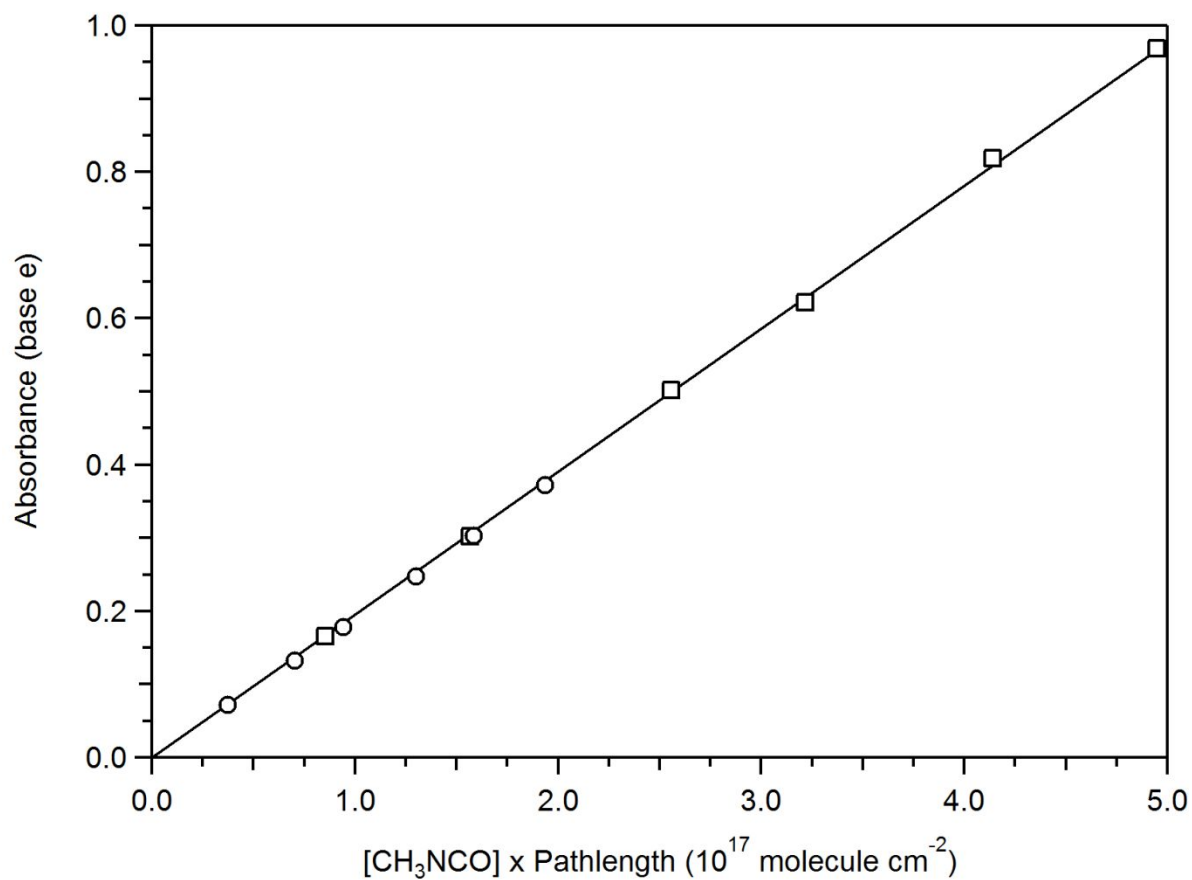

**Figure S4.** CH<sub>3</sub>NCO 184.9 nm absorption cross section determination data. Measurements were made using two independently prepared dilute gas mixtures of CH<sub>3</sub>NCO in He, 3.48% (circles) and 3.09 % (squares), and absorption cells with pathlengths of 25 and 100 cm, respectively.



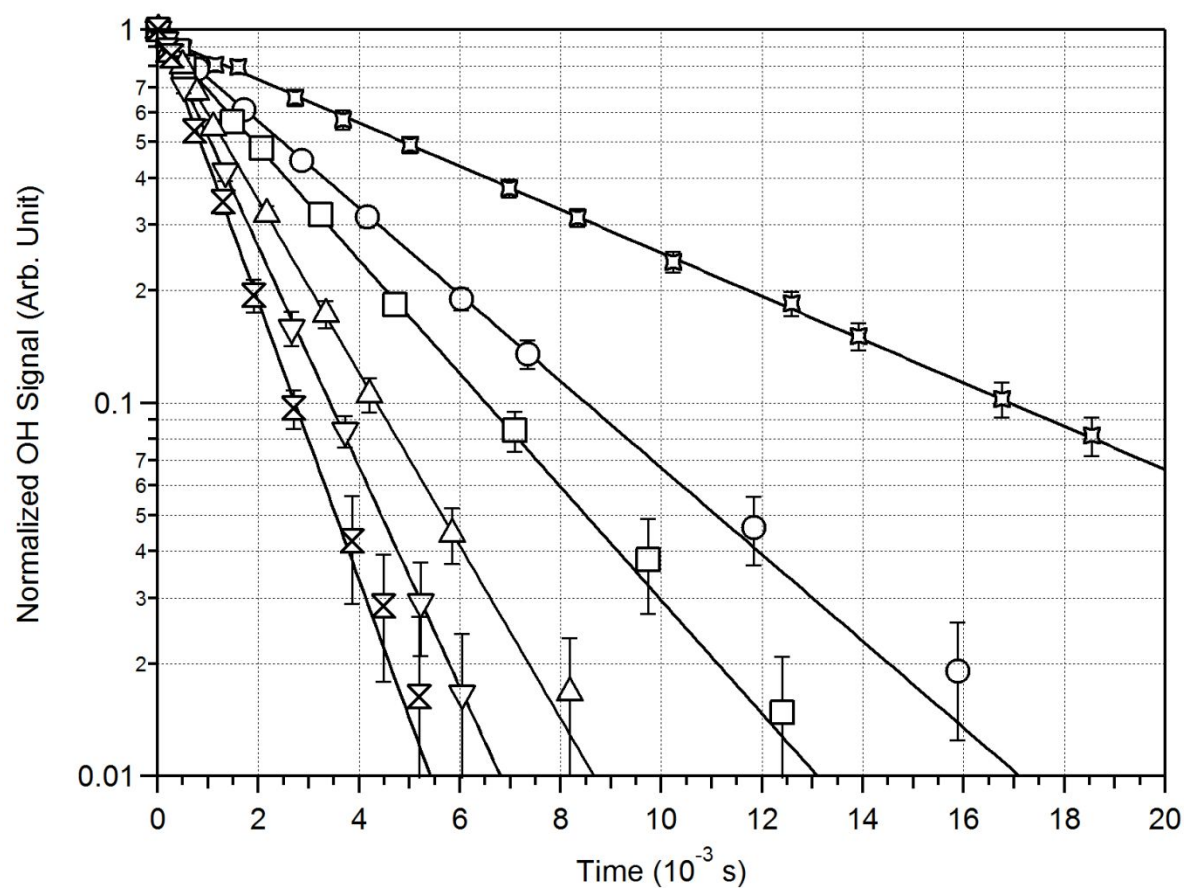

**Figure S5.** Representative normalized OH temporal profiles measured in this work for the OH + CH<sub>3</sub>NCO reaction using the PLP–LIF technique at 296 K and 100 Torr total pressure (He bath gas). The OH decays were measured with [CH<sub>3</sub>NCO] (10<sup>15</sup> molecule cm<sup>-3</sup>): 0, 0.87, 1.38, 2.56, 3.68, and 4.90 in the order of increasing slope. The lines are least-squares fit and the data error bars are the 1σ measurement precision.

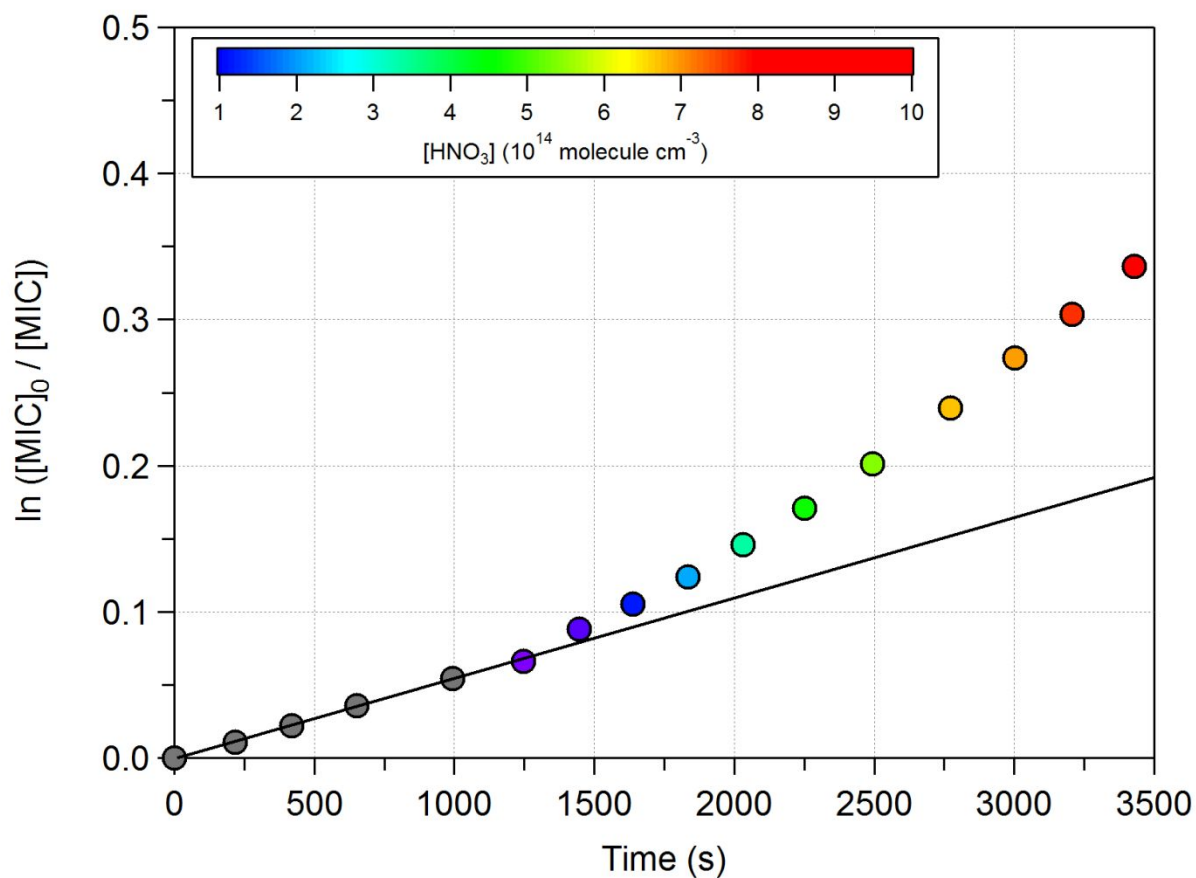

**Figure S6.** Loss of  $\text{CH}_3\text{NCO}$ , followed by infrared spectroscopy, with and without  $\text{HNO}_3$  present in the reactor. The initial data (grey points) is the loss of  $\text{CH}_3\text{NCO}$  without  $\text{HNO}_3$  present (the linear least-squares fit to the data is shown with the black line). The increased loss of  $\text{CH}_3\text{NCO}$  in the presence of  $\text{HNO}_3$  is shown with the colored data points where the color scale represents  $[\text{HNO}_3]$ .

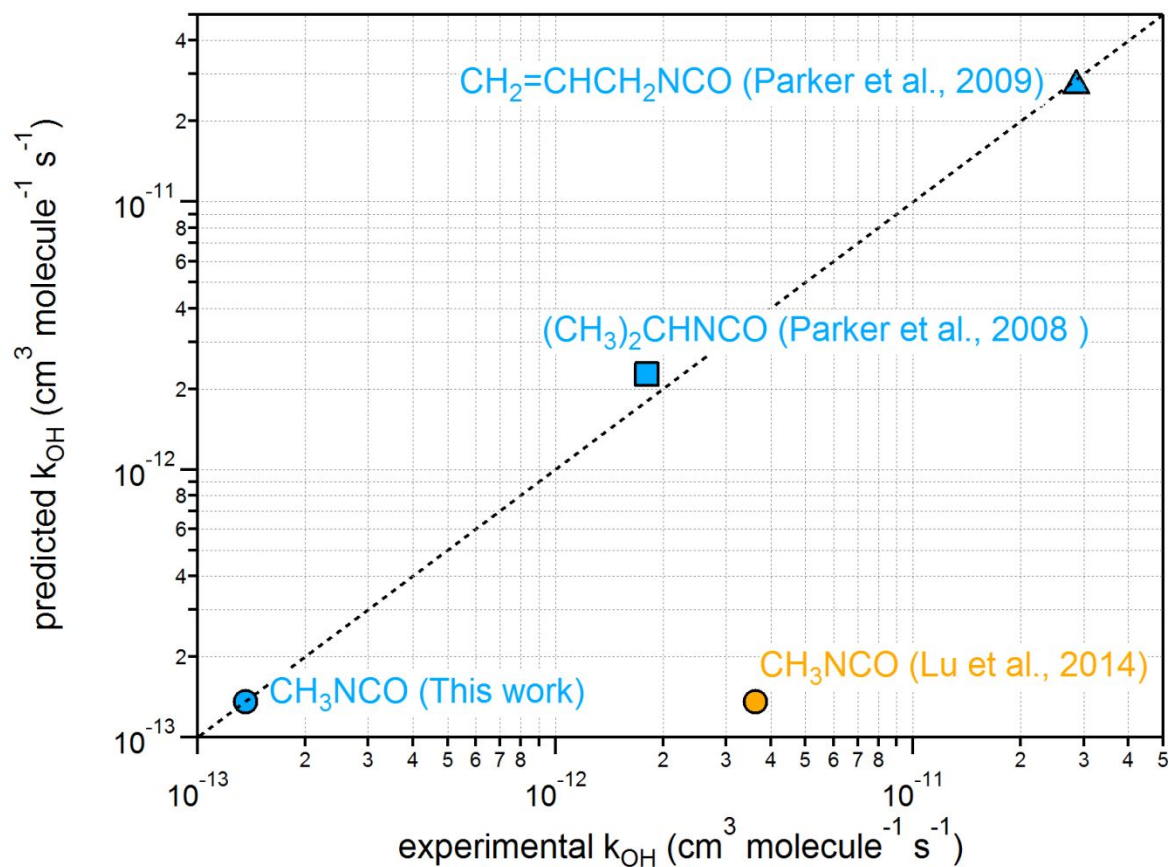

**Figure S7.** Comparison of the predicted OH rate coefficients, at 298 K, for methyl isocyanate,  $\text{CH}_3\text{NCO}$ , isopropyl isocyanate,  $(\text{CH}_3)_2\text{CHNCO}$ , and allyl isocyanate,  $(\text{CH}_2=\text{CHCH}_2\text{NCO})$  using the structure activity relationship of Kwok and Atkinson<sup>8</sup> with the experimentally determined values from this and previous work.<sup>9,10</sup> The dashed line represents the 1:1 relationship. For comparison, the OH rate coefficient for  $\text{CH}_3\text{NCO}$  from the work of Lu et al.<sup>11</sup> is included.

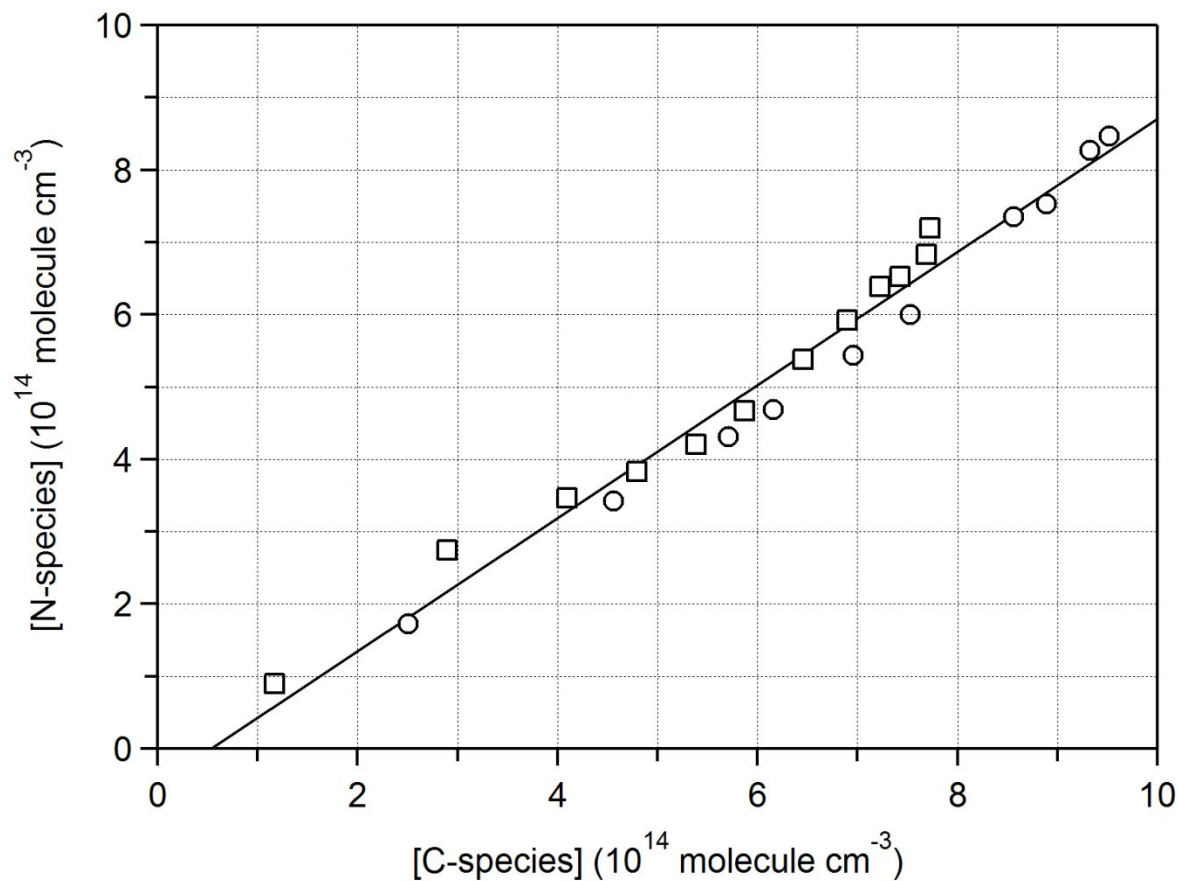

**Figure S8.** Sum of nitrogen species mass (calculated as  $2 \text{ N}_2\text{O} + \text{HNCO} + \text{HC(O)NCO}$ ) compared with the sum of carbon species mass (calculated as  $\frac{1}{2} \text{ CO} + \frac{1}{2} \text{ CO} + \frac{1}{2} \text{ HNCO} + \text{HC(O)NCO}$ ). The data included in the analysis are from the OH (circles) and Cl (squares) initiated oxidation experiments. The solid line is a linear least-squares fit of the data with a slope of  $0.92 \pm 0.06$ .

## References:

- (1) Hirschmann, R. P.; Kniseley, R. N.; Fassel, V. A. The infrared spectra of alkyl isocyanates. *Spectrochimica Acta* **1965**, *21*, 2125-2133.
- (2) Sharpe, S. W.; Johnson, T. J.; Sams, R. L.; Chu, P. M.; Rhoderick, G. C.; Johnson, P. A. Gas-phase databases for quantitative infrared spectroscopy. *App. Spectrosc.* **2004**, *58*, 1452-1461.
- (3) Roberge, R.; Sandorfy, C.; Strausz, O. P. The electronic spectra of the alkyl, fluorine and chlorine substituted derivatives of silane. *Theoretica chimica acta* **1979**, *52*, 171-179.
- (4) Bernard, F.; Papanastasiou, D. K.; Papadimitriou, V. C.; Burkholder, J. B. Temperature dependent rate coefficients for the gas-phase reaction of the OH radical with linear (L2, L3) and cyclic (D3, D4) permethylsiloxanes. *J. Phys. Chem. A* **2018**, *122*, 4252-4264.
- (5) Tokue, I.; Hiraya, A.; Shobatake, K. Photoexcitation of CH<sub>3</sub>NCO, CH<sub>3</sub>NCS and CH<sub>3</sub>SCN in the vacuum ultraviolet: Rydberg states and photofragment emission. *CHem. Phys.* **1987**, *117*, 315-324.
- (6) Papanastasiou, D. K.; Bernard, F.; Burkholder, J. B. Trimethylchlorosilane, (CH<sub>3</sub>)<sub>3</sub>SiCl: OH reaction kinetics and infrared spectrum. *Int. J. Chem. Kinet.* **2020**, 1-6.
- (7) Bernard, F.; Papanastasiou, D. K.; Papadimitriou, V. C.; Burkholder, J. B. Infrared absorption spectra of linear (L2 –L5) and cyclic (D3–D6 ) permethylsiloxanes. *J. Quant. Spec. Rad. Trans.* **2017**, *202*, 247-254.
- (8) Kwok, E. S. C.; Atkinson, R. Estimation of hydroxyl radical reaction rate constants for gas-phase organic compounds using a structure-reactivity relationship: An update. *Atmos. Environ.* **1995**, *29*, 1685-1695.
- (9) Parker, J. K.; Espada-Jallad, C. Kinetics of the gas-phase reactions of OH and NO<sub>3</sub> radicals and O<sub>3</sub> with allyl alcohol and allyl isocyanate. *J. Phys. Chem. A* **2009**, *113*, 9814-9824.
- (10) Parker, J. K.; Espada-Jallad, C.; Parker, C. L.; Witt, J. D. Measurement and calculation of the rate constant for the reaction of isopropyl isocyanate with hydroxyl radical. *Int. J. Chem. Kinet.* **2009**, *41*, 187-197.
- (11) Lu, Z.; Hebert, V. R.; Miller, G. C. Gas-phase reaction of methyl isothiocyanate and methyl isocyanate with hydroxyl radicals under static relative rate conditions. *J. Agricul. Food Chem.* **2014**, *62*, 1792-1795.
